# Supplementary material for: Facial Motion Capture System Based on Facial Electromyogram and Electrooculogram for Immersive Social Virtual Reality Applications
Source: Sensors (Basel). 2023 Mar 29;23(7):3580. doi: 10.3390/s23073580 (PMC10099104; doi:10.3390/s23073580)
Supplement: Supplementary file 1 [file sensors-23-03580-s001.zip › sensors-2186968-supplementary.pdf]

**Supplementary Table S1.** List of all blendshape weights from f-clone system

| # 1~15 | Blend Shape Weights   | #16~29 | Blend Shape Weights   |
|--------|-----------------------|--------|-----------------------|
| 1      | Head rotation X       | 16     | Mouth Left Spread     |
| 2      | Head rotation Y       | 17     | Mouth Right Spread    |
| 3      | Head rotation Z       | 18     | Mouth Left Frow       |
| 4      | Brow Left Up          | 19     | Mouth Right Frow      |
| 5      | Brow Left Down        | 20     | Mouth Left Centerize  |
| 6      | Brow Right UP         | 21     | Mouth Right Centerize |
| 7      | Brow Right Down       | 22     | Cheek left Up         |
| 8      | Brow Centerize        | 23     | Cheek Right Up        |
| 9      | Left Brow Outer Down  | 24     | Left Eye rotation X   |
| 10     | Right Brow Outer Down | 25     | Left Eye Rotation Y   |
| 11     | Eye close Left        | 26     | Left Eye Rotation Z   |
| 12     | Eye close Right       | 27     | Right Eye rotation X  |
| 13     | Mouth Open            | 28     | Right Eye rotation Y  |
| 14     | Mouth Left Smile      | 29     | Right Eye rotation Z  |
| 15     | Mouth Right Smile     |        |                       |

**Supplementary Table S2.** List of all facial gestures reconstructed in this study and blend shape weights related to each facial expression.

| # 1~8 | Facial expressions                | BSW and v-BSW                                                                    |
|-------|-----------------------------------|----------------------------------------------------------------------------------|
| 1     | Neutral                           | -                                                                                |
| 2     | Mouth open                        | Mouth open, Mouth left spread, Mouth right spread                                |
| 3     | Smile                             | Mouth open, Mouth left spread, Mouth right spread, Cheek left up, Cheek right up |
| 4     | Raise the left corner of the lip  | Mouth left spread, Cheek left up                                                 |
| 5     | Raise the right corner of the lip | Mouth right spread, Cheek right up                                               |
| 6     | Raise the eyebrows                | Brow left up, Brow right up                                                      |
| 7     | Eye blink                         | Eye lid close                                                                    |
| 8     | Horizontal eye motion             | Right eye rotation X, Left eye rotation X                                        |

**Supplementary Table S3.** Detailed structure of fEMG dataset for calibration. Note that the eye-blink detection does not require training.

| Details of fEMG dataset           |                      |
|-----------------------------------|----------------------|
| # of trial per facial expression  | 1                    |
| Length of single trial            | 3 sec                |
| Length of each signal window      | 100 ms               |
| Length of overlap between windows | 50 ms                |
| # of signal windows per trial     | 59                   |
| # of channels                     | 10                   |
| # of facial expressions           | 7 (except eye blink) |
